# Supplementary material for: Room temperature fabrication of highly proton conductive amorphous zirconia-based thin films achieved through precise nanostructure control
Source: Royal Society of Chemistry journal article supplement (doi:10.1039/d3tc02084c), 2023-01-01
Supplement: d3tc02084c1.pdf [file d3tc02084c1.pdf]

## Supplementary information

### Room temperature fabrication of highly proton conductive amorphous zirconia-based thin films achieved by precise control of nanostructure

Makoto Takayanagi<sup>1,2</sup>, Takashi Tsuchiya<sup>1\*</sup>, Daiki Nishioka<sup>1,2</sup>, Tohru Higuchi<sup>2\*</sup>, and Kazuya Terabe<sup>1</sup>

<sup>1</sup> Research Center for Materials Nanoarchitectonics (MANA), National Institute for Materials Science (NIMS), 1-1 Namiki, Tsukuba, Ibaraki, 305-0044, Japan.

<sup>2</sup>Department of Applied Physics, Faculty of Science, Tokyo University of Science, Katsushika, Tokyo 125-8585, Japan

\*Email: TSUCHIYA.Takashi@nims.go.jp, higuchi@rs.tus.ac.jp

## Supplementary discussions

1. XRD patterns of YSZ thin films deposited under various  $P_{O_2}$  conditions.

Figure S1 shows partial magnification XRD patterns of Fig. 3(a). There is almost no difference in the position and FWHM of the Pt (111) peak, which indicates that the crystallinity did not differ between the samples. Therefore, the crystallinity of the Pt electrode can be excluded as the reason for the observed variation in the conductivity of the YSZ thin films in this study.

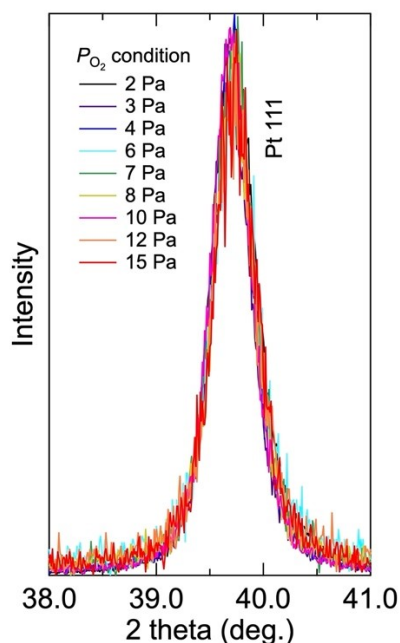

Figure S1. Magnified XRD patterns around the Pt (111) peak.

## 2. Ac impedance spectroscopy of Pt/YSZ/Pt two terminal

Electrical conductivity measurements was performed by AC impedance spectroscopy with a frequency response analyzer (Solartron 1260) and a high impedance interface (Solartron 1296). The AC voltage and frequency range were determined to be 100 mV and 1 MHz-100 mHz, respectively. We show representative Cole-Cole plots of  $|Z|$  of the Pt/YSZ/Pt cell in Fig. S2. In order to analyze the impedance spectra, the fitting to the experimental data was performed by assuming an equivalent circuit.  $R_C$ ,  $R_B$  and  $C_B$  represents contact resistance, resistance and associated capacitance in the bulk element of YSZ.  $R_{CT}$  and  $C_{DL}$  represent the charge transfer resistance and the associated capacitance. The good agreement of the fitting results with the experiments supports the validity of the fitting. Based on the  $R_B$  obtained by the fitting, we calculated conductivity of YSZ thin film.

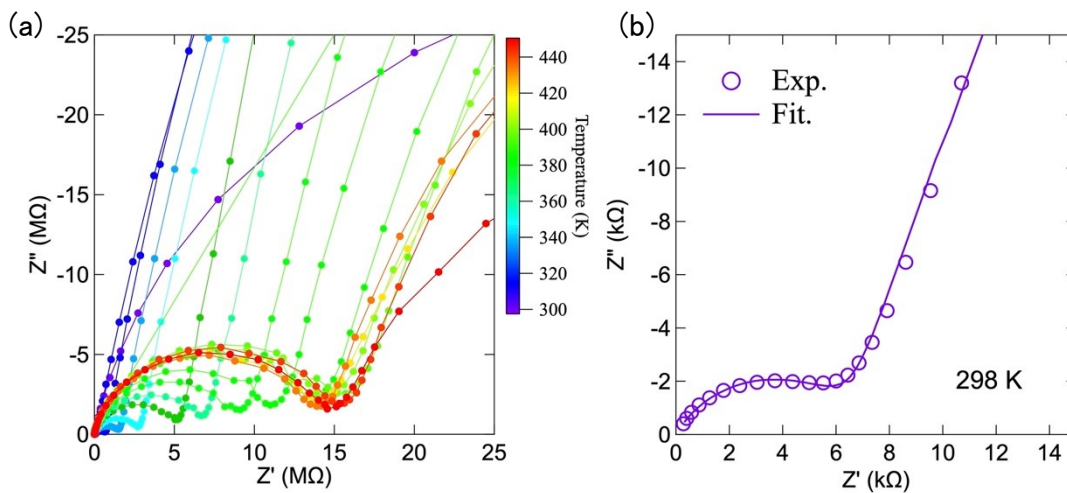

Figure S2. (a) Cole-Cole plots of AC impedance spectroscopy for a Pt/YSZ/Pt cell under various temperature region. The YSZ thin film was deposited under  $P_{O_2}$  of 10 Pa. (b) Cole-Cole (solid black circles) and fitting (solid red line) plots of the Fig. S2(a) at 298 K.
